# Supplementary material
Source: PubMed Central journal article supplement (PMC6483639)
Supplement: jciinsight-4-125489-s048.pdf [file jciinsight-4-125489-s048.pdf]

**Supplemental Table 1. The Results of NanoString analysis using nCounter Mouse Immunology Panel.** C57BL/6 mice were transplanted with BALB/c heart allografts and either left untreated, treated with mATG (1 mg on d. 0 and 4 posttransplant) or treated with mATG and depleting anti-mouse CD4 mAb. Spleen B220<sup>+</sup> cells were isolated by flow sorting on d. 12 posttransplant followed by RNA isolation and NanoString hybridization and analysis as described in the Methods. Gene expression for all groups was normalized to B cells isolated from naïve, non-transplanted C57BL/7 mice. The genes mentioned in the text are highlighted.

| gene    | no treatment | mATG   | mATG + anti-CD4 | mATG/no treatment |
|---------|--------------|--------|-----------------|-------------------|
| Clec4e  | 1,07         | 96,54  | 1,08            | 90,22             |
| Ptgs2   | 1,07         | 78,50  | 1,65            | 73,36             |
| Clec5a  | 2,11         | 103,99 | 1,08            | 49,28             |
| Card9   | 2,69         | 125,37 | 2,48            | 46,61             |
| Trem2   | 1,07         | 33,78  | 1,08            | 31,57             |
| Fn1     | 7,50         | 219,52 | 22,05           | 29,27             |
| Il18rap | 0,14         | 4,04   | 0,14            | 28,86             |
| Fcer1a  | 1,65         | 43,29  | 1,08            | 26,24             |
| Cfh     | 1,07         | 27,83  | 1,08            | 26,01             |
| Il1rl1  | 0,96         | 24,90  | 1,10            | 25,94             |
| Csf3r   | 0,55         | 13,26  | 0,30            | 24,11             |
| C4a     | 1,07         | 25,64  | 1,08            | 23,96             |
| Tnfsf14 | 1,07         | 20,61  | 1,08            | 19,26             |
| Pdcd1   | 1,07         | 19,50  | 1,08            | 18,22             |
| Plau    | 1,65         | 29,02  | 1,08            | 17,59             |
| Il27    | 1,07         | 17,96  | 1,08            | 16,79             |
| S100a8  | 3,79         | 56,23  | 3,09            | 14,84             |
| C3      | 5,62         | 71,35  | 1,57            | 12,70             |
| Msr1    | 1,07         | 13,54  | 1,08            | 12,65             |
| Hlx     | 0,72         | 9,04   | 1,75            | 12,56             |
| Nod2    | 0,29         | 3,56   | 0,30            | 12,28             |
| Il2rb   | 0,44         | 5,29   | 1,22            | 12,02             |
| Nfil3   | 16,48        | 197,35 | 3,52            | 11,98             |
| Aire    | 0,48         | 5,62   | 0,48            | 11,71             |
| Il15    | 1,07         | 11,99  | 1,08            | 11,21             |
| Cx3cr1  | 2,97         | 32,46  | 1,08            | 10,93             |
| Itga5   | 1,03         | 11,21  | 1,08            | 10,88             |
| Ccl2    | 1,79         | 19,29  | 1,08            | 10,78             |
| Il11ra1 | 0,35         | 3,74   | 0,90            | 10,69             |
| Gata3   | 0,58         | 6,14   | 0,59            | 10,59             |

|          |      |       |       |       |
|----------|------|-------|-------|-------|
| Bst1     | 0,44 | 4,63  | 2,05  | 10,52 |
| Trem1    | 0,46 | 4,36  | 0,22  | 9,48  |
| Ltbr     | 4,18 | 39,53 | 1,14  | 9,46  |
| Gzmb     | 0,29 | 2,73  | 0,24  | 9,41  |
| Il15ra   | 0,40 | 3,63  | 0,15  | 9,08  |
| Klra7    | 0,59 | 5,24  | 0,99  | 8,88  |
| Ccr2     | 4,64 | 40,79 | 2,94  | 8,79  |
| Il6      | 1,07 | 9,33  | 1,08  | 8,72  |
| Csf2rb   | 0,61 | 5,16  | 0,95  | 8,46  |
| Ptafr    | 0,38 | 3,20  | 0,49  | 8,42  |
| Cdkn1a   | 8,23 | 68,09 | 8,53  | 8,27  |
| Il1r2    | 1,07 | 8,81  | 1,08  | 8,23  |
| Zap70    | 0,14 | 1,15  | 0,46  | 8,21  |
| Il6st    | 0,32 | 2,61  | 0,86  | 8,16  |
| Rag1     | 1,07 | 8,70  | 33,83 | 8,13  |
| Eomes    | 0,15 | 1,15  | 0,35  | 7,67  |
| Icam4    | 5,40 | 41,21 | 1,08  | 7,63  |
| Fasl     | 0,73 | 5,51  | 1,22  | 7,55  |
| Ltb4r1   | 2,34 | 15,94 | 1,51  | 6,81  |
| Il2ra    | 0,13 | 0,88  | 2,43  | 6,77  |
| Fkbp5    | 0,56 | 3,65  | 1,76  | 6,52  |
| Il10     | 1,07 | 6,90  | 1,08  | 6,45  |
| Camp     | 8,67 | 55,50 | 7,28  | 6,40  |
| App      | 1,33 | 8,08  | 0,60  | 6,08  |
| Il1b     | 1,62 | 9,38  | 0,40  | 5,79  |
| Ltf      | 0,58 | 3,30  | 0,59  | 5,69  |
| Il13ra1  | 1,14 | 6,48  | 0,27  | 5,68  |
| Il6ra    | 0,39 | 2,21  | 1,17  | 5,67  |
| Il7r     | 0,39 | 2,18  | 1,51  | 5,59  |
| Mbp      | 0,30 | 1,64  | 0,89  | 5,47  |
| Tnfsf13b | 1,07 | 5,70  | 1,08  | 5,33  |
| Zbtb7b   | 0,37 | 1,93  | 1,15  | 5,22  |
| Cul9     | 0,16 | 0,82  | 0,53  | 5,13  |
| Cish     | 0,40 | 1,96  | 1,04  | 4,90  |
| Gfi1     | 7,65 | 37,25 | 24,99 | 4,87  |
| Tnfrsf1b | 0,68 | 3,21  | 1,10  | 4,72  |
| Il17rb   | 1,07 | 5,05  | 1,08  | 4,72  |
| Lilrb4   | 3,87 | 17,87 | 1,84  | 4,62  |
| Tlr2     | 0,45 | 1,90  | 0,86  | 4,22  |

|          |      |       |      |      |
|----------|------|-------|------|------|
| Ncam1    | 1,07 | 4,51  | 1,08 | 4,21 |
| Itgam    | 0,81 | 3,40  | 0,64 | 4,20 |
| Ccl6     | 1,89 | 7,81  | 0,54 | 4,13 |
| Nt5e     | 1,16 | 4,79  | 0,15 | 4,13 |
| Ccr10    | 0,38 | 1,53  | 0,42 | 4,03 |
| H2-Ea-ps | 0,41 | 1,60  | 1,13 | 3,90 |
| Tfrc     | 1,46 | 5,66  | 1,60 | 3,88 |
| Cxcl10   | 2,75 | 10,62 | 0,31 | 3,86 |
| Ccl9     | 5,97 | 22,84 | 1,94 | 3,83 |
| Cd244    | 0,67 | 2,52  | 0,63 | 3,76 |
| Ptk2     | 0,75 | 2,81  | 1,09 | 3,75 |
| Irf3     | 0,13 | 0,48  | 0,38 | 3,69 |
| Tnfrsf14 | 0,61 | 2,22  | 0,83 | 3,64 |
| S100a9   | 2,98 | 10,83 | 2,03 | 3,63 |
| Prf1     | 0,31 | 1,10  | 0,52 | 3,55 |
| Tnfaip3  | 1,44 | 5,05  | 2,29 | 3,51 |
| Pdcd1lg2 | 0,34 | 1,19  | 1,24 | 3,50 |
| Cd86     | 0,94 | 3,23  | 0,92 | 3,44 |
| Slamf1   | 0,46 | 1,57  | 0,94 | 3,41 |
| Chuk     | 0,57 | 1,93  | 1,09 | 3,39 |
| Btla     | 0,39 | 1,32  | 1,13 | 3,38 |
| Gzma     | 0,34 | 1,15  | 0,39 | 3,38 |
| Cd3eap   | 1,34 | 4,53  | 0,90 | 3,38 |
| Nfkbiz   | 0,59 | 1,91  | 1,44 | 3,24 |
| Abcb10   | 0,80 | 2,57  | 1,03 | 3,21 |
| C1ra     | 1,07 | 3,39  | 1,08 | 3,17 |
| Muc1     | 1,07 | 3,37  | 1,08 | 3,15 |
| Ikzf1    | 0,54 | 1,70  | 1,38 | 3,15 |
| Phlpp2   | 0,54 | 1,68  | 1,07 | 3,11 |
| Tgfb1    | 1,69 | 5,16  | 0,62 | 3,05 |
| Tmem173  | 0,55 | 1,67  | 1,06 | 3,04 |
| Notch1   | 0,32 | 0,97  | 0,85 | 3,03 |
| Tyk2     | 0,54 | 1,62  | 1,02 | 3,00 |
| Itgax    | 1,00 | 2,99  | 0,83 | 2,99 |
| Ptger4   | 1,24 | 3,68  | 2,13 | 2,97 |
| Smad5    | 0,45 | 1,32  | 1,05 | 2,93 |
| Ccbp2    | 0,40 | 1,17  | 0,49 | 2,93 |
| Il18r1   | 0,12 | 0,35  | 0,09 | 2,92 |
| Jak3     | 0,41 | 1,19  | 0,68 | 2,90 |

|         |        |        |       |      |
|---------|--------|--------|-------|------|
| Ctla4   | 26,79  | 77,73  | 3,56  | 2,90 |
| Sh2d1a  | 0,44   | 1,24   | 0,45  | 2,82 |
| Tnf     | 0,63   | 1,76   | 1,43  | 2,79 |
| Cd44    | 0,98   | 2,65   | 1,13  | 2,70 |
| Socs3   | 1,26   | 3,40   | 0,88  | 2,70 |
| Cd7     | 1,12   | 3,01   | 1,41  | 2,69 |
| Ifi204  | 2,08   | 5,55   | 0,33  | 2,67 |
| Prdm1   | 0,80   | 2,12   | 0,18  | 2,65 |
| Lef1    | 0,14   | 0,37   | 0,85  | 2,64 |
| Ccr5    | 1,17   | 3,09   | 0,93  | 2,64 |
| Rela    | 0,55   | 1,45   | 1,11  | 2,64 |
| Npc1    | 0,36   | 0,94   | 0,84  | 2,61 |
| Irak2   | 0,43   | 1,12   | 1,09  | 2,60 |
| Phlpp1  | 0,40   | 1,02   | 1,03  | 2,55 |
| Cd27    | 0,46   | 1,17   | 0,59  | 2,54 |
| Spn     | 0,91   | 2,31   | 0,84  | 2,54 |
| Trp53   | 0,65   | 1,65   | 1,18  | 2,54 |
| Entpd1  | 0,80   | 2,03   | 0,72  | 2,54 |
| Ccl7    | 0,54   | 1,37   | 1,15  | 2,54 |
| Plaur   | 0,93   | 2,34   | 1,64  | 2,52 |
| Atm     | 0,44   | 1,10   | 0,98  | 2,50 |
| Pax5    | 0,32   | 0,80   | 1,02  | 2,50 |
| Ifih1   | 0,73   | 1,82   | 0,87  | 2,49 |
| Folr4   | 0,15   | 0,37   | 0,22  | 2,47 |
| Tnfrsf4 | 0,28   | 0,69   | 1,55  | 2,46 |
| Hcst    | 0,88   | 2,11   | 1,09  | 2,40 |
| Il12rb1 | 0,84   | 2,01   | 0,27  | 2,39 |
| Tyrobp  | 1,66   | 3,97   | 1,06  | 2,39 |
| Traf4   | 0,59   | 1,41   | 1,70  | 2,39 |
| Tgfb3   | 1,01   | 2,40   | 0,89  | 2,38 |
| Bst2    | 1,13   | 2,68   | 1,44  | 2,37 |
| Smad3   | 0,44   | 1,04   | 0,93  | 2,36 |
| Tgfb1   | 0,53   | 1,25   | 1,17  | 2,36 |
| Abcb1a  | 0,14   | 0,33   | 0,62  | 2,36 |
| Cd83    | 1,74   | 4,09   | 2,02  | 2,35 |
| Klra6   | 1,07   | 2,51   | 1,08  | 2,35 |
| Ctsg    | 109,17 | 254,78 | 18,16 | 2,33 |
| Mx1     | 0,30   | 0,70   | 1,00  | 2,33 |
| Atg16l1 | 0,50   | 1,16   | 1,02  | 2,32 |

|        |       |       |      |      |
|--------|-------|-------|------|------|
| Casp8  | 0,55  | 1,25  | 0,96 | 2,27 |
| Dpp4   | 0,41  | 0,93  | 0,94 | 2,27 |
| Cd80   | 0,41  | 0,93  | 0,54 | 2,27 |
| Bcl2   | 0,45  | 1,02  | 1,04 | 2,27 |
| Stat5a | 0,55  | 1,24  | 0,92 | 2,25 |
| Ahr    | 0,40  | 0,90  | 0,46 | 2,25 |
| Cd274  | 0,53  | 1,19  | 1,34 | 2,25 |
| Ikbkap | 0,46  | 1,02  | 0,87 | 2,22 |
| Itga4  | 0,33  | 0,73  | 0,94 | 2,21 |
| Nfatc1 | 0,40  | 0,88  | 0,92 | 2,20 |
| Ifngr1 | 0,82  | 1,80  | 1,16 | 2,20 |
| Ncf4   | 0,57  | 1,24  | 1,17 | 2,18 |
| Syk    | 0,59  | 1,28  | 1,46 | 2,17 |
| Klra4  | 1,07  | 2,32  | 1,08 | 2,17 |
| Csf1   | 0,42  | 0,91  | 0,52 | 2,17 |
| Nfkb2  | 0,56  | 1,21  | 1,41 | 2,16 |
| Tlr8   | 0,90  | 1,94  | 0,86 | 2,16 |
| Cd22   | 0,45  | 0,97  | 0,93 | 2,16 |
| Jak2   | 0,52  | 1,12  | 1,14 | 2,15 |
| Relb   | 0,73  | 1,55  | 1,32 | 2,12 |
| Cd19   | 0,62  | 1,30  | 1,15 | 2,10 |
| Tgfbr1 | 0,56  | 1,17  | 1,03 | 2,09 |
| Map4k2 | 0,41  | 0,85  | 0,94 | 2,07 |
| Psbmb9 | 1,32  | 2,73  | 1,03 | 2,07 |
| Ikbkb  | 0,53  | 1,09  | 1,20 | 2,06 |
| Map4k4 | 0,48  | 0,98  | 1,07 | 2,04 |
| Ifitm1 | 5,03  | 10,26 | 1,11 | 2,04 |
| Cd2    | 0,62  | 1,26  | 1,33 | 2,03 |
| Fas    | 3,56  | 7,22  | 0,69 | 2,03 |
| Prim1  | 2,00  | 4,05  | 1,44 | 2,03 |
| Ptprc  | 0,48  | 0,97  | 0,97 | 2,02 |
| Lilrb3 | 0,60  | 1,21  | 0,85 | 2,02 |
| Cd109  | 0,78  | 1,57  | 0,65 | 2,01 |
| Tal1   | 34,01 | 68,37 | 4,20 | 2,01 |
| Xbp1   | 1,57  | 3,15  | 0,98 | 2,01 |
| Traf3  | 0,38  | 0,76  | 1,38 | 2,00 |
| Fyn    | 0,54  | 1,07  | 0,87 | 1,98 |
| Igf2r  | 0,36  | 0,71  | 0,65 | 1,97 |
| Cmklr1 | 0,30  | 0,58  | 0,13 | 1,93 |

|         |      |      |      |      |
|---------|------|------|------|------|
| Ciita   | 0,50 | 0,96 | 0,98 | 1,92 |
| Ii12rb2 | 0,65 | 1,24 | 0,66 | 1,91 |
| Ptpn22  | 0,54 | 1,02 | 1,02 | 1,89 |
| Ube2l3  | 0,83 | 1,55 | 1,14 | 1,87 |
| Tigit   | 1,27 | 2,37 | 1,08 | 1,87 |
| Notch2  | 0,27 | 0,50 | 0,85 | 1,85 |
| Ikzf2   | 0,56 | 1,03 | 0,56 | 1,84 |
| Nfatc2  | 0,40 | 0,73 | 1,07 | 1,83 |
| Adal    | 0,51 | 0,93 | 1,09 | 1,82 |
| Stat5b  | 0,62 | 1,12 | 1,08 | 1,81 |
| Ctsc    | 0,66 | 1,19 | 0,98 | 1,80 |
| Fcer1g  | 2,32 | 4,17 | 0,67 | 1,80 |
| Runx1   | 0,38 | 0,68 | 0,95 | 1,79 |
| Tapbp   | 0,55 | 0,98 | 0,99 | 1,78 |
| Klrc1   | 0,86 | 1,53 | 0,80 | 1,78 |
| Ikbkg   | 0,62 | 1,10 | 0,94 | 1,77 |
| Tollip  | 0,72 | 1,27 | 1,16 | 1,76 |
| Btk     | 0,67 | 1,18 | 1,14 | 1,76 |
| Btl2    | 0,32 | 0,56 | 0,99 | 1,75 |
| Ltb4r2  | 1,07 | 1,87 | 1,08 | 1,75 |
| Lair1   | 0,88 | 1,53 | 0,18 | 1,74 |
| Cttnb1  | 0,57 | 0,99 | 1,03 | 1,74 |
| Ccr9    | 1,25 | 2,17 | 0,55 | 1,74 |
| Tbk1    | 0,49 | 0,85 | 0,90 | 1,73 |
| Stat2   | 0,48 | 0,82 | 0,91 | 1,71 |
| Ifnar1  | 0,43 | 0,73 | 1,02 | 1,70 |
| Cxcl9   | 0,72 | 1,22 | 0,94 | 1,69 |
| Prkcd   | 0,51 | 0,86 | 1,08 | 1,69 |
| Irf5    | 0,66 | 1,11 | 1,12 | 1,68 |
| Mapk1   | 0,67 | 1,12 | 1,07 | 1,67 |
| Pdcd2   | 1,08 | 1,80 | 1,15 | 1,67 |
| Lif     | 1,07 | 1,78 | 1,08 | 1,66 |
| Sell    | 0,56 | 0,93 | 0,99 | 1,66 |
| Klra8   | 0,88 | 1,46 | 0,93 | 1,66 |
| Ptpn2   | 0,76 | 1,26 | 1,12 | 1,66 |
| Cd14    | 1,49 | 2,46 | 0,21 | 1,65 |
| Cebpb   | 2,75 | 4,45 | 2,66 | 1,62 |
| Casp2   | 0,49 | 0,79 | 0,98 | 1,61 |
| Itgb1   | 1,16 | 1,86 | 0,99 | 1,60 |

|          |      |      |      |      |
|----------|------|------|------|------|
| Ikzf3    | 0,35 | 0,56 | 1,00 | 1,60 |
| Psm7     | 1,12 | 1,79 | 1,23 | 1,60 |
| Ddx58    | 0,37 | 0,59 | 1,01 | 1,59 |
| Mapk14   | 0,66 | 1,05 | 1,16 | 1,59 |
| Nfkb1    | 0,56 | 0,89 | 1,06 | 1,59 |
| Cxcr5    | 0,63 | 1,00 | 1,29 | 1,59 |
| Klrd1    | 0,77 | 1,21 | 0,63 | 1,57 |
| Runx3    | 0,65 | 1,01 | 0,66 | 1,55 |
| Nox1     | 1,07 | 1,66 | 1,08 | 1,55 |
| Stat6    | 0,60 | 0,93 | 1,21 | 1,55 |
| Slamf7   | 0,83 | 1,28 | 0,90 | 1,54 |
| Abl1     | 0,50 | 0,77 | 0,95 | 1,54 |
| Cd97     | 0,43 | 0,66 | 1,01 | 1,53 |
| Traf1    | 0,85 | 1,30 | 0,97 | 1,53 |
| Cd74     | 0,69 | 1,05 | 1,20 | 1,52 |
| Kit      | 1,07 | 1,62 | 1,08 | 1,51 |
| Itgal    | 0,49 | 0,74 | 0,98 | 1,51 |
| Cd48     | 0,61 | 0,92 | 0,91 | 1,51 |
| B2m      | 0,81 | 1,22 | 1,08 | 1,51 |
| Ccl19    | 1,07 | 1,61 | 1,08 | 1,50 |
| Fadd     | 0,34 | 0,51 | 0,87 | 1,50 |
| Cd8a     | 0,08 | 0,12 | 0,11 | 1,50 |
| Ccr12    | 2,71 | 4,04 | 1,87 | 1,49 |
| Ets1     | 0,50 | 0,74 | 1,07 | 1,48 |
| Il1rap   | 0,48 | 0,71 | 0,79 | 1,48 |
| Sigirr   | 0,48 | 0,70 | 0,85 | 1,46 |
| Traf5    | 0,77 | 1,12 | 1,19 | 1,45 |
| Tirap    | 0,52 | 0,75 | 0,79 | 1,44 |
| C1qbp    | 1,08 | 1,54 | 1,00 | 1,43 |
| Itgb2    | 0,79 | 1,12 | 0,92 | 1,42 |
| Ikbke    | 0,48 | 0,68 | 0,47 | 1,42 |
| Serping1 | 1,64 | 2,32 | 1,08 | 1,41 |
| Cd209g   | 1,07 | 1,51 | 1,08 | 1,41 |
| Irak1    | 0,57 | 0,80 | 0,95 | 1,40 |
| Psm10    | 1,08 | 1,51 | 1,19 | 1,40 |
| Itga6    | 0,66 | 0,92 | 0,89 | 1,39 |
| Il27ra   | 0,59 | 0,82 | 1,16 | 1,39 |
| Tcf4     | 0,49 | 0,68 | 0,95 | 1,39 |
| Mapk11   | 0,47 | 0,65 | 1,16 | 1,38 |

|           |       |       |      |      |
|-----------|-------|-------|------|------|
| Clec4a4   | 0,21  | 0,29  | 0,21 | 1,38 |
| Tnfrsf11a | 0,52  | 0,71  | 0,84 | 1,37 |
| Klrk1     | 0,64  | 0,87  | 0,66 | 1,36 |
| Tnfrsf13c | 0,81  | 1,08  | 1,26 | 1,33 |
| Tagap     | 1,16  | 1,53  | 2,11 | 1,32 |
| Bcl3      | 0,60  | 0,79  | 1,14 | 1,32 |
| Traf6     | 0,74  | 0,97  | 1,22 | 1,31 |
| Lilra6    | 0,29  | 0,38  | 1,17 | 1,31 |
| Il4ra     | 0,52  | 0,68  | 1,02 | 1,31 |
| Bcl6      | 0,72  | 0,94  | 1,39 | 1,31 |
| Rae1      | 0,84  | 1,09  | 1,13 | 1,30 |
| Ceacam1   | 0,28  | 0,36  | 0,94 | 1,29 |
| Tgfbr2    | 0,43  | 0,55  | 0,91 | 1,28 |
| Abcf1     | 0,65  | 0,83  | 1,02 | 1,28 |
| Il10rb    | 0,55  | 0,70  | 0,97 | 1,27 |
| Gpr183    | 1,20  | 1,52  | 1,38 | 1,27 |
| Zeb1      | 0,45  | 0,57  | 1,14 | 1,27 |
| Ski       | 0,38  | 0,48  | 0,99 | 1,26 |
| Ilf3      | 0,62  | 0,78  | 0,98 | 1,26 |
| Cdh5      | 1,03  | 1,29  | 1,08 | 1,25 |
| Psmc2     | 1,01  | 1,26  | 1,05 | 1,25 |
| Tlr1      | 0,49  | 0,61  | 1,01 | 1,24 |
| Maf       | 3,48  | 4,33  | 2,85 | 1,24 |
| Tbx21     | 1,27  | 1,58  | 0,21 | 1,24 |
| Pou2f2    | 0,38  | 0,47  | 0,88 | 1,24 |
| Ccl25     | 1,48  | 1,81  | 0,22 | 1,22 |
| Cd81      | 0,68  | 0,83  | 0,95 | 1,22 |
| Cd1d1     | 0,73  | 0,89  | 0,89 | 1,22 |
| Tap1      | 0,60  | 0,72  | 0,76 | 1,20 |
| Il17f     | 1,07  | 1,28  | 1,08 | 1,20 |
| Irf1      | 0,72  | 0,86  | 0,69 | 1,19 |
| Aicda     | 11,60 | 13,69 | 0,05 | 1,18 |
| Il21r     | 0,50  | 0,59  | 1,05 | 1,18 |
| Ccr1      | 43,93 | 51,73 | 1,08 | 1,18 |
| Mif       | 1,22  | 1,43  | 1,09 | 1,17 |
| Ccr6      | 0,65  | 0,76  | 1,02 | 1,17 |
| Stat1     | 0,67  | 0,78  | 0,75 | 1,16 |
| Traf2     | 0,68  | 0,79  | 1,24 | 1,16 |
| Klrb1     | 1,07  | 1,24  | 1,08 | 1,16 |



|           |      |      |      |      |
|-----------|------|------|------|------|
| Il1r1     | 1,27 | 1,47 | 1,08 | 1,16 |
| Cd79a     | 0,52 | 0,59 | 0,93 | 1,13 |
| Lck       | 0,90 | 1,02 | 0,93 | 1,13 |
| Casp1     | 0,86 | 0,97 | 0,95 | 1,13 |
| Casp3     | 1,93 | 2,15 | 1,06 | 1,11 |
| Cybb      | 0,63 | 0,70 | 0,84 | 1,11 |
| Cd99      | 1,01 | 1,12 | 1,05 | 1,11 |
| Tlr5      | 0,46 | 0,51 | 0,56 | 1,11 |
| Map4k1    | 0,56 | 0,62 | 0,98 | 1,11 |
| Icosl     | 0,40 | 0,44 | 0,87 | 1,10 |
| Nfkbia    | 0,63 | 0,69 | 1,27 | 1,10 |
| Cd24a     | 1,08 | 1,16 | 1,40 | 1,07 |
| Irak3     | 0,45 | 0,48 | 0,99 | 1,07 |
| Gm10499   | 0,93 | 0,99 | 1,33 | 1,06 |
| Nfatc3    | 0,50 | 0,53 | 1,08 | 1,06 |
| Ptpn6     | 0,68 | 0,72 | 1,11 | 1,06 |
| Tnfrsf13b | 0,54 | 0,57 | 0,96 | 1,06 |
| Pecam1    | 0,41 | 0,43 | 0,87 | 1,05 |
| Cd164     | 0,71 | 0,74 | 0,96 | 1,04 |
| Cfp       | 1,08 | 1,12 | 0,76 | 1,04 |
| Irf4      | 0,96 | 0,99 | 1,82 | 1,03 |
| Tlr9      | 0,36 | 0,37 | 0,90 | 1,03 |
| Il17a     | 0,59 | 0,60 | 0,60 | 1,02 |
| Hif1a     | 0,61 | 0,62 | 0,98 | 1,02 |
| Il20      | 0,68 | 0,69 | 0,71 | 1,01 |
| Tnfsf15   | 1,03 | 1,04 | 1,08 | 1,01 |
| Nos2      | 1,07 | 1,08 | 0,24 | 1,01 |
| Irak4     | 0,55 | 0,55 | 0,88 | 1,00 |
| Jak1      | 0,53 | 0,53 | 1,00 | 1,00 |
| Cd247     | 0,17 | 0,17 | 0,12 | 1,00 |
| Tcf7      | 0,08 | 0,08 | 0,15 | 1,00 |
| C1s       | 1,07 | 1,06 | 1,08 | 0,99 |
| C7        | 1,07 | 1,06 | 1,08 | 0,99 |
| Ccl12     | 1,07 | 1,06 | 1,08 | 0,99 |
| H2-Q10    | 1,07 | 1,06 | 1,08 | 0,99 |
| Tslp      | 1,07 | 1,06 | 1,08 | 0,99 |
| Cd6       | 0,62 | 0,61 | 0,63 | 0,98 |
| Mapkapk2  | 0,60 | 0,59 | 0,92 | 0,98 |
| Ccl11     | 1,79 | 1,76 | 1,08 | 0,98 |

|         |      |      |      |      |
|---------|------|------|------|------|
| Cxcr6   | 0,53 | 0,52 | 0,54 | 0,98 |
| Il9     | 0,91 | 0,89 | 0,92 | 0,98 |
| Cd46    | 0,78 | 0,76 | 0,92 | 0,97 |
| Cd8b1   | 0,78 | 0,76 | 0,79 | 0,97 |
| Il10ra  | 0,39 | 0,38 | 1,01 | 0,97 |
| Ccl24   | 0,38 | 0,37 | 0,38 | 0,97 |
| Rag2    | 1,07 | 1,04 | 2,02 | 0,97 |
| C8b     | 1,07 | 1,04 | 1,48 | 0,97 |
| C4bp    | 1,07 | 1,04 | 1,08 | 0,97 |
| C8a     | 1,07 | 1,04 | 1,08 | 0,97 |
| C8g     | 1,07 | 1,04 | 1,08 | 0,97 |
| C9      | 1,07 | 1,04 | 1,08 | 0,97 |
| Ccl20   | 1,07 | 1,04 | 1,08 | 0,97 |
| Ccl26   | 1,07 | 1,04 | 1,08 | 0,97 |
| Ccl8    | 1,07 | 1,04 | 1,08 | 0,97 |
| Ccr4    | 1,07 | 1,04 | 1,08 | 0,97 |
| Ccr8    | 1,07 | 1,04 | 1,08 | 0,97 |
| Cd160   | 1,07 | 1,04 | 1,08 | 0,97 |
| Cd59b   | 1,07 | 1,04 | 1,08 | 0,97 |
| Cd96    | 1,07 | 1,04 | 1,08 | 0,97 |
| Cfd     | 1,07 | 1,04 | 1,08 | 0,97 |
| Cfi     | 1,07 | 1,04 | 1,08 | 0,97 |
| Csf2    | 1,07 | 1,04 | 1,08 | 0,97 |
| Cx3cl1  | 1,07 | 1,04 | 1,08 | 0,97 |
| Cxcl1   | 1,07 | 1,04 | 1,08 | 0,97 |
| Cxcl11  | 1,07 | 1,04 | 1,08 | 0,97 |
| Cxcl12  | 1,07 | 1,04 | 1,08 | 0,97 |
| Cxcl13  | 1,07 | 1,04 | 1,08 | 0,97 |
| Cxcl15  | 1,07 | 1,04 | 1,08 | 0,97 |
| Cxcl3   | 1,07 | 1,04 | 1,08 | 0,97 |
| Cxcr1   | 1,07 | 1,04 | 1,08 | 0,97 |
| Cxcr2   | 1,07 | 1,04 | 1,08 | 0,97 |
| Defb1   | 1,07 | 1,04 | 1,08 | 0,97 |
| Defb14  | 1,07 | 1,04 | 1,08 | 0,97 |
| Foxp3   | 1,07 | 1,04 | 1,08 | 0,97 |
| Frrmpd4 | 1,07 | 1,04 | 1,08 | 0,97 |
| Gpr44   | 1,07 | 1,04 | 1,08 | 0,97 |
| H60a    | 1,07 | 1,04 | 1,08 | 0,97 |
| Hamp    | 1,07 | 1,04 | 1,08 | 0,97 |

|         |      |      |      |      |
|---------|------|------|------|------|
| Icam5   | 1,07 | 1,04 | 1,08 | 0,97 |
| Ifna1   | 1,07 | 1,04 | 1,08 | 0,97 |
| Ifna2   | 1,07 | 1,04 | 1,08 | 0,97 |
| Ifnb1   | 1,07 | 1,04 | 1,08 | 0,97 |
| Ifng    | 1,07 | 1,04 | 1,08 | 0,97 |
| Ikzf4   | 1,07 | 1,04 | 1,08 | 0,97 |
| Il17b   | 1,07 | 1,04 | 1,08 | 0,97 |
| Il19    | 1,07 | 1,04 | 1,08 | 0,97 |
| Il1rl2  | 1,07 | 1,04 | 1,08 | 0,97 |
| Il1rn   | 1,07 | 1,04 | 1,08 | 0,97 |
| Il2     | 1,07 | 1,04 | 1,08 | 0,97 |
| Il21    | 1,07 | 1,04 | 1,08 | 0,97 |
| Il22    | 1,07 | 1,04 | 1,08 | 0,97 |
| Il23a   | 1,07 | 1,04 | 1,08 | 0,97 |
| Il23r   | 1,07 | 1,04 | 1,08 | 0,97 |
| Il25    | 1,07 | 1,04 | 1,08 | 0,97 |
| Il28a   | 1,07 | 1,04 | 1,08 | 0,97 |
| Il3     | 1,07 | 1,04 | 1,08 | 0,97 |
| Il33    | 1,07 | 1,04 | 1,08 | 0,97 |
| Il4     | 1,07 | 1,04 | 1,08 | 0,97 |
| Il5     | 1,07 | 1,04 | 1,08 | 0,97 |
| Kir3dl1 | 1,07 | 1,04 | 1,08 | 0,97 |
| Kir3dl2 | 1,07 | 1,04 | 1,08 | 0,97 |
| Klra1   | 1,07 | 1,04 | 1,08 | 0,97 |
| Klra21  | 1,07 | 1,04 | 1,08 | 0,97 |
| Klra5   | 1,07 | 1,04 | 1,08 | 0,97 |
| Klrc2   | 1,07 | 1,04 | 1,08 | 0,97 |
| Klrc3   | 1,07 | 1,04 | 1,08 | 0,97 |
| Masp1   | 1,07 | 1,04 | 1,08 | 0,97 |
| Masp2   | 1,07 | 1,04 | 1,08 | 0,97 |
| Mbl2    | 1,07 | 1,04 | 1,08 | 0,97 |
| Mme     | 1,07 | 1,04 | 1,08 | 0,97 |
| Nox3    | 1,07 | 1,04 | 1,08 | 0,97 |
| Nox4    | 1,07 | 1,04 | 1,08 | 0,97 |
| Pigr    | 1,07 | 1,04 | 1,08 | 0,97 |
| Pla2g2a | 1,07 | 1,04 | 1,08 | 0,97 |
| Pla2g2e | 1,07 | 1,04 | 1,08 | 0,97 |
| Psmb11  | 1,07 | 1,04 | 1,08 | 0,97 |
| Rorc    | 1,07 | 1,04 | 1,08 | 0,97 |

|         |      |      |      |      |
|---------|------|------|------|------|
| Sele    | 1,07 | 1,04 | 1,08 | 0,97 |
| Selp1g  | 1,07 | 1,04 | 1,08 | 0,97 |
| Tgfb2   | 1,07 | 1,04 | 1,08 | 0,97 |
| Tnfaip6 | 1,07 | 1,04 | 1,08 | 0,97 |
| Tnfrsf8 | 1,07 | 1,04 | 1,08 | 0,97 |
| Tnfrsf9 | 1,07 | 1,04 | 1,08 | 0,97 |
| Tnfsf11 | 1,07 | 1,04 | 1,08 | 0,97 |
| Tnfsf8  | 1,07 | 1,04 | 1,08 | 0,97 |
| Vtn     | 1,07 | 1,04 | 1,08 | 0,97 |
| Xcr1    | 1,07 | 1,04 | 1,08 | 0,97 |
| Il17re  | 1,00 | 0,97 | 1,00 | 0,97 |
| Ccl3    | 1,09 | 1,05 | 1,02 | 0,96 |
| Cd3d    | 0,23 | 0,22 | 0,09 | 0,96 |
| Pdgfrb  | 1,07 | 1,02 | 1,08 | 0,95 |
| Pml     | 0,42 | 0,40 | 0,93 | 0,95 |
| Cd40lg  | 0,98 | 0,93 | 0,98 | 0,95 |
| Il2rg   | 0,51 | 0,48 | 1,12 | 0,94 |
| Csf1r   | 0,84 | 0,79 | 0,37 | 0,94 |
| Icos    | 1,07 | 1,00 | 1,08 | 0,93 |
| Bax     | 1,21 | 1,13 | 1,24 | 0,93 |
| Cr2     | 0,38 | 0,35 | 0,81 | 0,92 |
| Il13    | 1,48 | 1,36 | 0,72 | 0,92 |
| H2-K1   | 0,81 | 0,74 | 1,13 | 0,91 |
| Il12a   | 0,81 | 0,72 | 1,22 | 0,89 |
| Ifnar2  | 0,68 | 0,60 | 1,00 | 0,88 |
| H2-Ob   | 0,58 | 0,51 | 0,83 | 0,88 |
| Fcgr2b  | 0,74 | 0,65 | 1,08 | 0,88 |
| H2-Eb1  | 0,81 | 0,71 | 1,05 | 0,88 |
| Gpi1    | 0,79 | 0,69 | 1,66 | 0,87 |
| Fcgr1   | 2,09 | 1,82 | 0,07 | 0,87 |
| Cd53    | 0,43 | 0,37 | 1,47 | 0,86 |
| Icam2   | 0,64 | 0,55 | 0,98 | 0,86 |
| Lcp2    | 2,83 | 2,43 | 1,29 | 0,86 |
| Thy1    | 0,07 | 0,06 | 0,06 | 0,86 |
| Batf    | 1,41 | 1,20 | 1,01 | 0,85 |
| Irf8    | 0,93 | 0,79 | 1,16 | 0,85 |
| Il17ra  | 0,48 | 0,40 | 0,88 | 0,83 |
| Hc      | 1,08 | 0,89 | 1,26 | 0,82 |
| Lta     | 0,68 | 0,56 | 1,16 | 0,82 |

|         |      |      |      |      |
|---------|------|------|------|------|
| Il7     | 1,27 | 1,04 | 1,08 | 0,82 |
| Src     | 1,27 | 1,04 | 1,08 | 0,82 |
| H2-Ab1  | 0,87 | 0,71 | 1,05 | 0,82 |
| Mr1     | 0,57 | 0,46 | 0,78 | 0,81 |
| H2-Aa   | 0,81 | 0,65 | 1,07 | 0,80 |
| Psbmb5  | 1,74 | 1,39 | 1,42 | 0,80 |
| Cd40    | 0,86 | 0,68 | 1,18 | 0,79 |
| Blnk    | 0,68 | 0,53 | 1,07 | 0,78 |
| Bcap31  | 0,77 | 0,60 | 1,02 | 0,78 |
| Il16    | 0,49 | 0,38 | 0,94 | 0,78 |
| Stat3   | 0,62 | 0,48 | 0,89 | 0,77 |
| Crlf2   | 0,79 | 0,61 | 1,10 | 0,77 |
| Tlr4    | 0,70 | 0,54 | 0,79 | 0,77 |
| Bid     | 0,86 | 0,66 | 0,92 | 0,77 |
| Litaf   | 1,50 | 1,15 | 0,98 | 0,77 |
| Ifit2   | 0,64 | 0,49 | 1,44 | 0,77 |
| Tnfsf10 | 0,78 | 0,58 | 0,80 | 0,74 |
| Cd55    | 0,73 | 0,54 | 1,35 | 0,74 |
| Cd4     | 0,57 | 0,42 | 0,07 | 0,74 |
| Arhgdib | 0,90 | 0,66 | 1,12 | 0,73 |
| Psbmb7  | 1,10 | 0,80 | 0,99 | 0,73 |
| Cfb     | 1,79 | 1,28 | 1,08 | 0,72 |
| Cd3e    | 0,07 | 0,05 | 0,03 | 0,71 |
| Cradd   | 1,14 | 0,80 | 0,95 | 0,70 |
| Il22ra2 | 1,49 | 1,04 | 1,48 | 0,70 |
| Itln1   | 1,49 | 1,04 | 1,08 | 0,70 |
| Ifi35   | 1,24 | 0,85 | 1,45 | 0,69 |
| Stat4   | 0,50 | 0,34 | 1,05 | 0,68 |
| Tlr3    | 0,39 | 0,26 | 0,49 | 0,67 |
| Ly86    | 0,89 | 0,59 | 1,08 | 0,66 |
| Myd88   | 0,91 | 0,60 | 0,93 | 0,66 |
| H2-DMa  | 0,92 | 0,60 | 1,04 | 0,65 |
| Ccl22   | 2,71 | 1,76 | 1,08 | 0,65 |
| Vcam1   | 1,31 | 0,85 | 0,45 | 0,65 |
| H2-DMb2 | 0,75 | 0,48 | 1,00 | 0,64 |
| Cd82    | 0,75 | 0,48 | 0,93 | 0,64 |
| Cxcr3   | 3,73 | 2,37 | 0,15 | 0,64 |
| Irgm1   | 0,82 | 0,52 | 0,97 | 0,63 |
| Il12b   | 1,65 | 1,04 | 1,08 | 0,63 |

|          |       |      |      |      |
|----------|-------|------|------|------|
| Ly96     | 0,91  | 0,57 | 0,89 | 0,63 |
| Ifngr2   | 0,71  | 0,44 | 1,05 | 0,62 |
| Icam1    | 0,84  | 0,52 | 0,96 | 0,62 |
| Socs1    | 2,66  | 1,62 | 0,73 | 0,61 |
| Irf7     | 0,84  | 0,51 | 1,77 | 0,61 |
| Cd5      | 0,27  | 0,16 | 0,28 | 0,59 |
| Fcgrt    | 0,80  | 0,47 | 0,85 | 0,59 |
| Cd79b    | 0,75  | 0,44 | 1,00 | 0,59 |
| Ctss     | 0,94  | 0,55 | 1,16 | 0,59 |
| Pparg    | 10,38 | 6,03 | 0,88 | 0,58 |
| Ccr7     | 2,11  | 1,20 | 2,64 | 0,57 |
| Tnfsf12  | 1,10  | 0,62 | 0,32 | 0,56 |
| Ms4a1    | 0,89  | 0,49 | 1,05 | 0,55 |
| Ltb      | 0,84  | 0,46 | 1,31 | 0,55 |
| Ebi3     | 0,66  | 0,36 | 1,13 | 0,55 |
| Cd226    | 3,03  | 1,65 | 0,43 | 0,54 |
| Ccl5     | 0,84  | 0,43 | 0,75 | 0,51 |
| Cd34     | 3,47  | 1,74 | 2,21 | 0,50 |
| Btnl1    | 0,42  | 0,21 | 0,22 | 0,50 |
| Marco    | 2,80  | 1,35 | 0,16 | 0,48 |
| Xcl1     | 2,87  | 1,28 | 2,36 | 0,45 |
| Cd36     | 0,99  | 0,44 | 0,92 | 0,44 |
| Cd28     | 2,45  | 1,06 | 0,65 | 0,43 |
| Cd69     | 5,34  | 2,31 | 3,51 | 0,43 |
| Ccr3     | 1,40  | 0,58 | 0,48 | 0,41 |
| Tnfsf18  | 1,30  | 0,53 | 0,54 | 0,41 |
| Fcgr4    | 2,89  | 1,13 | 0,35 | 0,39 |
| C6       | 1,10  | 0,43 | 0,22 | 0,39 |
| Il1a     | 3,38  | 1,24 | 1,08 | 0,37 |
| Tnfrsf17 | 3,51  | 1,25 | 0,64 | 0,36 |
| Il18     | 2,11  | 0,75 | 0,76 | 0,36 |
| Cd163    | 0,76  | 0,27 | 0,25 | 0,36 |
| Ccl4     | 4,03  | 1,36 | 1,58 | 0,34 |
| Clu      | 15,95 | 5,36 | 0,31 | 0,34 |
| Batf3    | 12,42 | 3,96 | 1,08 | 0,32 |
| Ppbp     | 14,70 | 4,54 | 0,63 | 0,31 |
| Pdgfb    | 4,05  | 1,25 | 0,33 | 0,31 |
| Cxcr4    | 1,22  | 0,35 | 1,35 | 0,29 |
| Cd9      | 1,62  | 0,46 | 0,61 | 0,28 |

|        |       |      |      |      |
|--------|-------|------|------|------|
| Fcamr  | 1,10  | 0,28 | 0,29 | 0,25 |
| Fcgr3  | 2,56  | 0,62 | 0,12 | 0,24 |
| Emr1   | 1,21  | 0,29 | 0,50 | 0,24 |
| C1qa   | 1,29  | 0,30 | 0,40 | 0,23 |
| Lilra5 | 3,55  | 0,72 | 0,54 | 0,20 |
| C1qb   | 1,62  | 0,32 | 0,41 | 0,20 |
| Itga2b | 42,69 | 7,09 | 1,05 | 0,17 |
| Hfe    | 2,42  | 0,18 | 0,34 | 0,07 |
| C2     | 0,96  | 0,06 | 0,12 | 0,06 |
| Gp1bb  | 28,29 | 1,76 | 1,08 | 0,06 |
|        |       |      |      |      |
